# Supplementary material
Source: Springer Nature journal article supplement (https://www.springermedizin.de/resource/supplementary/12958_2013_1147_MOESM2_ESM.pdf/9566888)

(a)

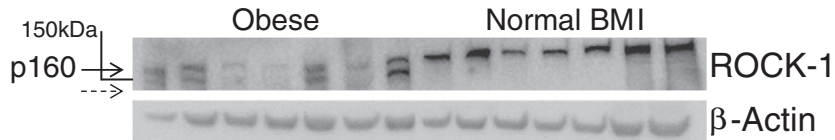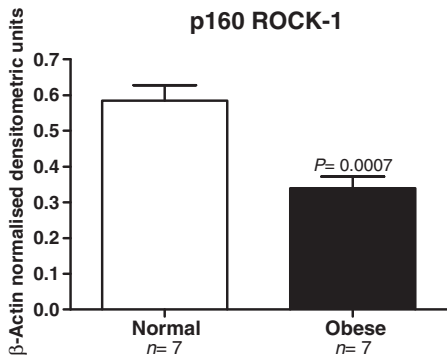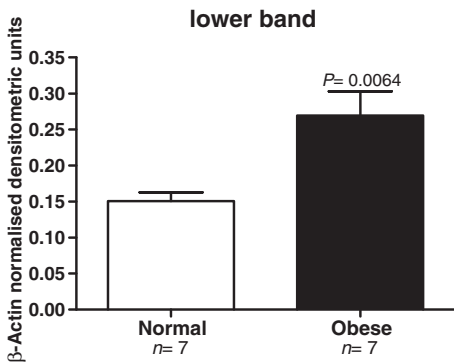

(b)

Supplement: MOESM2 [file 9566888]
